# Supplementary material
Source: PubMed Central journal article supplement (PMC7041584)
Supplement: JCM.01443-19-s0001.pdf [file JCM.01443-19-s0001.pdf]

TEST ACCURACY OF HUMAN PAPILLOMAVIRUS IN URINE FOR DETECTION OF  
CERVICAL INTRA-EPITHELIAL NEOPLASIA

**SUPPLEMENTARY MATERIAL**

**Supplementary Table S1:** Test accuracy of Onclarity hrHPV assay on different samples for the detection of CIN2+ in 243 colposcopy patients with triple matched samples, using the established Onclarity cycle threshold\* for provider-collected samples on all sample types.

**Supplementary Table S2:** Agreement between Onclarity hrHPV testing in urine and in self-collected cervico-vaginal or provider-collected cervical samples among 243 colposcopy patients with triple matched samples.

**Supplementary Table S3:** Test accuracy of Onclarity hrHPV assay on different samples for the detection of CIN2+ in 64 “research only” participants with triple matched samples, using the established Onclarity cycle threshold\* for provider-collected samples on all sample types.

**Supplementary Table S4:** Agreement between Onclarity hrHPV testing in urine and in self-collected cervico-vaginal or provider-collected cervical samples among 64 “research only” participants with triple matched samples.

**Supplementary Table S5:** Test accuracy of Onclarity hrHPV assay on different samples for the detection of CIN2+ including all valid results for a given sample type and using the established Onclarity cycle threshold\* for provider-collected samples on all sample types.

**Supplementary Table S6:** Test accuracy of Onclarity hrHPV assay on different samples for the detection of CIN3+, using the established Onclarity cycle threshold for provider-collected samples on all sample types.

**Supplementary Table S1:** Test accuracy of Onclarity hrHPV assay on different samples for the detection of CIN2+ in 243 colposcopy patients with triple matched samples, using the established Onclarity cycle threshold\* for provider-collected samples on all sample types.

| Type of sample                 | hrHPV assay | Histology       |                  | Sensitivity (95% CI) | Specificity (95% CI) |
|--------------------------------|-------------|-----------------|------------------|----------------------|----------------------|
|                                |             | CIN2+<br>N = 81 | <CIN2<br>N = 162 |                      |                      |
| Urine                          | Positive    | 65              | 94               | 80.3% (71.6-88.9%)   | 42.0% (34.4-49.6%)   |
|                                | Negative    | 16              | 68               |                      |                      |
| Self-collected cervico-vaginal | Positive    | 77              | 108              | 95.1% (90.3-99.8%)   | 33.3% (26.1-40.6%)   |
|                                | Negative    | 4               | 54               |                      |                      |
| Provider-collected cervical    | Positive    | 77              | 104              | 95.1% (90.3-99.8%)   | 35.8% (28.4-43.2%)   |
|                                | Negative    | 4               | 58               |                      |                      |

CIN, cervical intraepithelial neoplasia; hrHPV, high-risk human papillomavirus.

\* Cycle threshold of  $\leq 34.2$  for all hrHPV subtypes, except HPV16 with cycle threshold set at  $\leq 38.3$  as per FDA-approved thresholds for provider-collected specimens.

**Supplementary Table S2:** Agreement between Onclarity hrHPV testing in urine and in self-collected cervico-vaginal or provider-collected cervical samples among 243 colposcopy patients with triple matched samples.

|                                               |                 | Urine samples (N) |          | Overall agreement (95% CI) | Positive agreement (95% CI) | Negative agreement (95% CI) | Cohen's kappa (95% CI) |
|-----------------------------------------------|-----------------|-------------------|----------|----------------------------|-----------------------------|-----------------------------|------------------------|
|                                               |                 | Positive          | Negative |                            |                             |                             |                        |
| <b>Self-collected cervico-vaginal samples</b> | <b>Positive</b> | 150 (62%)         | 35 (14%) | 82%                        | 87%                         | 69%                         | 0.56                   |
|                                               | <b>Negative</b> | 9 (4%)            | 49 (20%) | (77-87%)                   | (83-91%)                    | (60-78%)                    | (0.46-0.68)            |
| <b>Provider-collected cervical samples</b>    | <b>Positive</b> | 147 (61%)         | 34 (14%) | 81%                        | 86%                         | 68%                         | 0.55                   |
|                                               | <b>Negative</b> | 12 (5%)           | 50 (21%) | (76-86%)                   | (83-90%)                    | (60-77%)                    | (0.44-0.67)            |

CI, confidence interval; CIN, cervical intraepithelial neoplasia; hrHPV, high-risk human papillomavirus.

**Supplementary Table S3:** Test accuracy of Onclarity hrHPV assay on different samples for the detection of CIN2+ in 64 “research only” participants with triple matched samples, using the established Onclarity cycle threshold\* for provider-collected samples on all sample types.

| Type of sample                 | hrHPV assay | Histology      |                 | Sensitivity (95% CI) | Specificity (95% CI) |
|--------------------------------|-------------|----------------|-----------------|----------------------|----------------------|
|                                |             | CIN2+<br>N = 2 | <CIN2<br>N = 62 |                      |                      |
| Urine                          | Positive    | 1              | 44              | 50.0% (0.0-100%)     | 29.0% (17.7-40.3%)   |
|                                | Negative    | 1              | 18              |                      |                      |
| Self-collected cervico-vaginal | Positive    | 1              | 49              | 50.0% (0.0-100%)     | 21.0% (10.8-31.1%)   |
|                                | Negative    | 1              | 13              |                      |                      |
| Provider-collected cervical    | Positive    | 1              | 34              | 50.0% (0.0-100%)     | 45.2% (32.8-57.6%)   |
|                                | Negative    | 1              | 28              |                      |                      |

CIN, cervical intraepithelial neoplasia; hrHPV, high-risk human papillomavirus.

\* Cycle threshold of  $\leq 34.2$  for all hrHPV subtypes, except HPV16 with cycle threshold set at  $\leq 38.3$  as per FDA-approved thresholds for provider-collected specimens.

**Supplementary Table S4:** Agreement between Onclarity hrHPV testing in urine and in self-collected cervico-vaginal or provider-collected cervical samples among 64 “research only” participants with triple matched samples.

|                                               |                 | Urine samples (N) |          | Overall agreement (95% CI) | Positive agreement (95% CI) | Negative agreement (95% CI) | Cohen’s kappa (95% CI) |
|-----------------------------------------------|-----------------|-------------------|----------|----------------------------|-----------------------------|-----------------------------|------------------------|
|                                               |                 | Positive          | Negative |                            |                             |                             |                        |
| <b>Self-collected cervico-vaginal samples</b> | <b>Positive</b> | 43 (67%)          | 7 (11%)  | 86%                        | 91%                         | 73%                         | 0.63                   |
|                                               | <b>Negative</b> | 2 (3%)            | 12 (19%) | (77-94%)                   | (84-97%)                    | (56-90%)                    | (0.42-0.85)            |
| <b>Provider-collected cervical samples</b>    | <b>Positive</b> | 32 (50%)          | 3 (5%)   | 75%                        | 80%                         | 67%                         | 0.48                   |
|                                               | <b>Negative</b> | 13 (20%)          | 16 (25%) | (64-86%)                   | (70-90%)                    | (51-82%)                    | (0.27-0.69)            |

CI, confidence interval; CIN, cervical intraepithelial neoplasia; hrHPV, high-risk human papillomavirus.

**Supplementary Table S5:** Test accuracy of Onclarity hrHPV assay on different samples for the detection of CIN2+ including all valid results for a given sample type and using the established Onclarity cycle threshold\* for provider-collected samples on all sample types.

| Type of sample                                  | hrHPV assay | Histology |       | Sensitivity (95% CI) | Specificity (95% CI) |
|-------------------------------------------------|-------------|-----------|-------|----------------------|----------------------|
|                                                 |             | CIN2+     | <CIN2 |                      |                      |
| <b>Urine (N = 403)</b>                          | Positive    | 92        | 170   | 80.0% (72.7-87.3%)   | 41.0% (35.3-46.7%)   |
|                                                 | Negative    | 23        | 118   |                      |                      |
| <b>Self-collected cervico-vaginal (N = 380)</b> | Positive    | 95        | 183   | 92.2% (87.1-97.4%)   | 33.9% (28.3-39.5%)   |
|                                                 | Negative    | 8         | 94    |                      |                      |
| <b>Provider-collected cervical (N = 343)</b>    | Positive    | 93        | 148   | 94.9% (90.5-99.3%)   | 39.6% (33.5-45.7%)   |
|                                                 | Negative    | 5         | 97    |                      |                      |

CIN, cervical intraepithelial neoplasia; hrHPV, high-risk human papillomavirus.

\* Cycle threshold of  $\leq 34.2$  for all hrHPV subtypes, except HPV16 with cycle threshold set at  $\leq 38.3$  as per FDA-approved thresholds for provider-collected specimens.

**Supplementary Table S6:** Test accuracy of Onclarity hrHPV assay on different samples for the detection of CIN3+\*, using the established Onclarity cycle threshold† for provider-collected samples on all sample types.

| Type of sample                 | hrHPV assay | Histology       |                  | Sensitivity (95% CI) | Specificity (95% CI) |
|--------------------------------|-------------|-----------------|------------------|----------------------|----------------------|
|                                |             | CIN3+<br>N = 49 | <CIN3<br>N = 258 |                      |                      |
| Urine                          | Positive    | 47              | 169              | 83.7 (73.3-94.0)     | 36.8 (30.9-42.7)     |
|                                | Negative    | 2               | 89               |                      |                      |
| Self-collected cervico-vaginal | Positive    | 47              | 188              | 95.9 (90.4-100.0)    | 27.1 (21.7-32.6)     |
|                                | Negative    | 2               | 70               |                      |                      |
| Provider-collected cervical    | Positive    | 41              | 163              | 95.9 (90.4-100.0)    | 34.5 (28.7-40.3)     |
|                                | Negative    | 8               | 95               |                      |                      |

CIN, cervical intraepithelial neoplasia; hrHPV, high-risk human papillomavirus.

\* CIN2/3 cases were categorized as CIN3+ for this analysis.

† Cycle threshold of  $\leq 34.2$  for all hrHPV subtypes, except HPV16 with cycle threshold set at  $\leq 38.3$  as per FDA-approved thresholds for provider-collected specimens.
